# Supplementary material for: Description of vital signs data measurement frequency in a medical/surgical unit at a community hospital in United States
Source: PubMed Central journal article supplement (PMC5726752; doi:10.1016/j.dib.2017.11.053), 2017-11-21
Supplement: mmc1.pdf [file mmc1.pdf]

## Philips Research

---

June 19, 2017

### Conflict of Interest

This research was conducted by the authors as a part of their duties while employed at Philips Research North America. Erina Ghosh and Eric Carlson are currently employed at Philips Research North America. Larry Eshelman currently serves as a consultant to Philips Research. Lin Yang and Bill Lord were formerly employed at Philips Research North America.

All authors have read and agree to the above statements.

Yours sincerely,

A handwritten signature in black ink, appearing to read 'E. Ghosh' with a horizontal line underneath.

Erina Ghosh, Ph.D.  
Senior Scientist,  
Acute Care Solutions  
Email: [Erina.ghosh@philips.com](mailto:Erina.ghosh@philips.com)
